# Supplementary material for: Hypertension Improvement Project (HIP): study protocol and implementation challenges
Source: PubMed Central journal article supplement (PMC2654882; doi:10.1186/1745-6215-10-13), 2009-02-26
Supplement: 1745-6215-10-13-S2.pdf [file 1745-6215-10-13-S2.pdf]

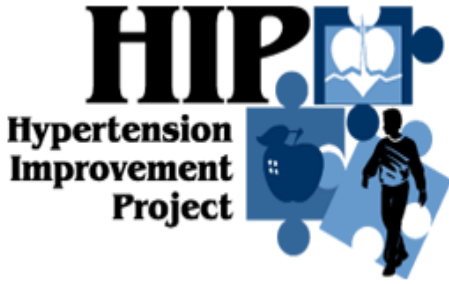

Provider ID # \_\_\_\_\_

Study ID #: \_\_\_\_\_

## Clinical Performance Measure

Attach to encounter form at each patient visit.

### TO BE COMPLETED BY NURSE OR PROVIDER

Patient Name: \_\_\_\_\_

DOB:                    \_\_\_/\_\_\_/\_\_\_                    Duke MR # (If applicable) \_\_\_\_\_

Date of last visit:   \_\_\_/\_\_\_/\_\_\_                    BP last visit:   \_\_\_/\_\_\_

Date of current visit: \_\_\_/\_\_\_/\_\_\_                    BP this visit:   \_\_\_/\_\_\_

### Risk factors/co-morbidities (check all that apply):

- Hypertension
- Diabetes
- Chronic Kidney Disease
- Coronary disease
- Heart failure
- Obesity/Overweight (BMI  $\geq$ 25)
- CVD

Weight: \_\_\_\_\_ lbs                    Height: \_\_\_\_\_ inches

### TO BE COMPLETED BY PROVIDER

Current BP medications at the start of this visit (check all that apply; check both classes if on combination drug):

- Diuretic   \_\_\_ Thiazide                    \_\_\_ Other Diuretic
- Beta blocker
- Calcium channel blocker
- Peripheral alpha antagonist (e.g., doxazosin/cardura)
- Central alpha agonists (e.g., clonidine)
- Vasodilator (e.g., minoxidil, hydralazine)
- Ace inhibitor
- Angiotensin receptor blocker (ARB)
- Other (please specify \_\_\_\_\_)

Is this patient at goal BP? (General <140/90; DM/CKD <130/80) \_\_\_yes   \_\_\_no

Actions taken on this visit (check all that apply):

- Start new BP medication
- Adjust dose of current BP medication
- Stop BP medication
- Refer to hypertension specialist  
(or to cardiologist or nephrologist for BP control)
- Refer for dietary counseling
- No action taken
- Counsel for weight loss
- Counsel to reduce sodium intake
- Counsel to increase physical activity
- Counsel to reduce alcohol intake
- Counsel on DASH diet
- Counsel regarding adherence

Number of minutes spent addressing BP: \_\_\_\_\_ minutes

Time of next scheduled visit: \_\_\_ weeks or \_\_\_ months

Follow-up visit with   \_\_\_MD                    \_\_\_Other health professional
